# Supplementary material
Source: publisher figshare collection journal article supplement (https://aacr.figshare.com/articles/dataset/_/22455977)
Supplement: Supplementary file 1 [file 39907130]

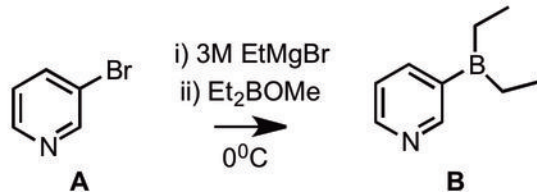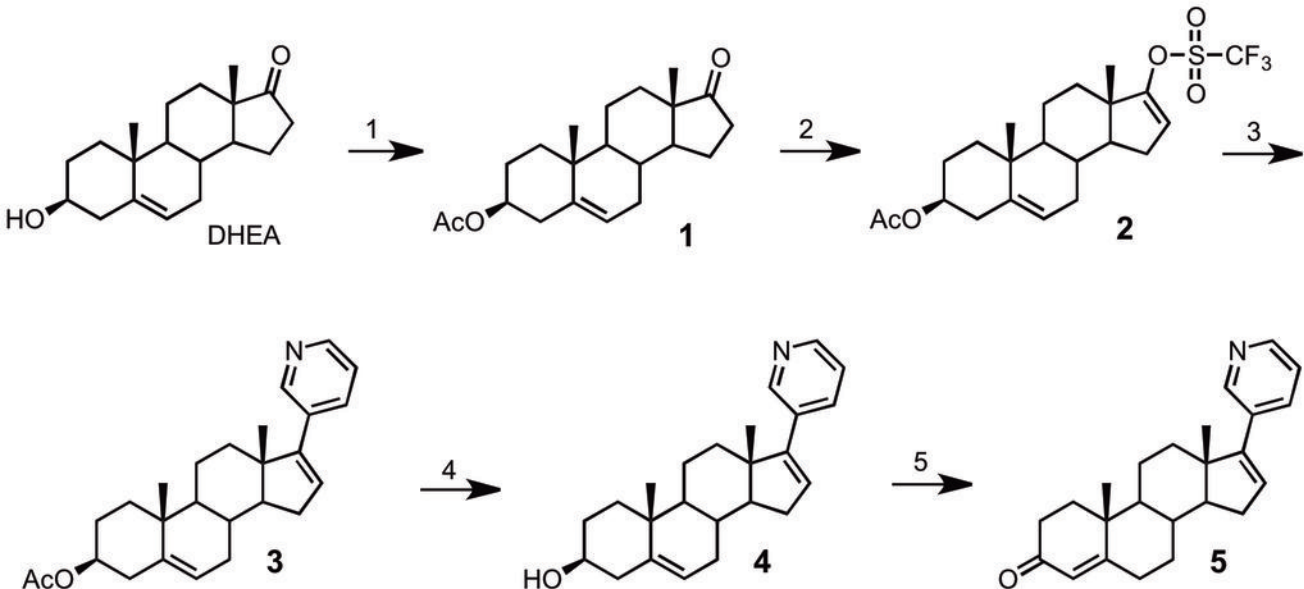

1) Pyridine, Ac<sub>2</sub>O, DMAP 2) THF, -78°C, KHMDS,  3) THF, Pd(PPh<sub>3</sub>)<sub>2</sub>Cl<sub>2</sub>, **B**, 80°C

4) KOH, Methanol, reflux 5) N-Methylpiperidone, Aluminium isopropoxide, Toluene
